# Supplementary material
Source: PubMed Central journal article supplement (PMC6037302)
Supplement: NIHMS976964-supplement-01.pdf [file NIHMS976964-supplement-01.pdf]

**Table S1. Adjusted odds ratios for complement factors measured at 12-15 and 16-19 weeks based on multiple imputation to account for missing data<sup>a</sup>**

| Predictor variable                        | Bb (12-15 weeks) <sup>b</sup><br>N=483 subjects, 98 events |              | Bb (16-19 weeks) <sup>c</sup><br>N= 473 subjects, 90 events |              | sC5b-9 (12-15 weeks) <sup>b</sup><br>N= 483 subjects, 98 events |              | sC5b-9 (16-19 weeks) <sup>c</sup><br>N= 473 subjects, 90 events |             |
|-------------------------------------------|------------------------------------------------------------|--------------|-------------------------------------------------------------|--------------|-----------------------------------------------------------------|--------------|-----------------------------------------------------------------|-------------|
|                                           | OR (95% CI)                                                | P-value      | OR (95% CI)                                                 | P-value      | OR (95% CI)                                                     | P-value      | OR (95% CI)                                                     | P-value     |
| Non-Hispanic White (yes vs no)            | 0.62 (0.36-1.07)                                           | 0.086        | 0.63 (0.36-1.10)                                            | 0.11         | 0.60 (0.35-1.03)                                                | 0.064        | 0.61 (0.35-1.05)                                                | 0.076       |
| SLE status (positive vs negative)         | 1.17 (0.54-2.56)                                           | 0.68         | 1.50 (0.66-3.43)                                            | 0.33         | 1.10 (0.50-2.40)                                                | 0.81         | 1.40 (0.62-3.17)                                                | 0.42        |
| LAC status (positive vs negative)         | 5.23 (2.57–10.67)                                          | <0.0001      | 5.11 (2.44–10.72)                                           | <0.0001      | 5.94 (2.92-12.09)                                               | <.0001       | 6.05(2.91-12.57)                                                | <0.0001     |
| History of thrombosis (yes vs no)         | 2.91 (1.48-5.71)                                           | 0.002        | 2.51 (1.22-5.18)                                            | 0.013        | 2.86 (1.46-5.61)                                                | 0.002        | 2.37 (1.17-4.81)                                                | 0.02        |
| Diastolic pressure > 80 mm Hg (yes vs no) | 3.52 (1.86-6.66)                                           | 0.0001       | 3.69 (1.91-7.14)                                            | 0.0001       | 3.43 (1.82-6.47)                                                | 0.0001       | 3.37 (1.77-6.39)                                                | 0.0002      |
| Aspirin Use (yes vs no)                   | 0.52 (0.30-0.91)                                           | 0.021        | 0.55 (0.31-0.97)                                            | 0.041        | 0.57 (0.33-0.99)                                                | 0.046        | 0.57 (0.33-1.00)                                                | 0.052       |
| Current anti-hypertensive (yes vs no)     | 3.88(1.78–8.48)                                            | 0.0007       | 4.14 (1.87–9.17)                                            | 0.0005       | 4.18 (1.91-9.16)                                                | 0.0003       | 4.11 (1.89-8.94)                                                | 0.0002      |
| BMI                                       |                                                            | 0.076        |                                                             | 0.15         |                                                                 | 0.03         |                                                                 | 0.04        |
| < 25                                      | 1                                                          |              | 1                                                           |              | 1                                                               |              | 1                                                               |             |
| 25-30                                     | 1.30 (0.70-2.42)                                           |              | 1.13 (0.54-2.19)                                            |              | 1.365(0.71-2.56)                                                |              | 1.21(0.63-2.35)                                                 |             |
| > 30                                      | 1.83 (0.95-3.51)                                           |              | 1.69 (0.86-3.33)                                            |              | 2.03(1.05-3.91)                                                 |              | 2.04 (1.06-3.94)                                                |             |
| Bb per SD increase <sup>d</sup>           | <b>1.32 (1.02-1.71)</b>                                    | <b>0.032</b> | <b>1.48 (1.13-1.94)</b>                                     | <b>0.005</b> | -----                                                           |              | -----                                                           |             |
| sC5b-9 per SD increase <sup>d</sup>       | -----                                                      |              | -----                                                       |              | <b>1.36 (1.05-1.76)</b>                                         | <b>0.018</b> | <b>1.22 (0.93-1.60)</b>                                         | <b>0.15</b> |
| Hosmer-Lemeshow Goodness-of-fit test      | 0.36                                                       |              | 0.67                                                        |              | 0.68                                                            |              | 0.46                                                            |             |
| AUC                                       | 0.81                                                       |              | 0.80                                                        |              | 0.80                                                            |              | 0.79                                                            |             |
| Cross-validated AUC                       | 0.78                                                       |              | 0.77                                                        |              | 0.78                                                            |              | 0.75                                                            |             |

<sup>a</sup> Missing data in the predictor variables was addressed using the Markov chain Monte Carlo multiple imputation approach in the SAS procedure, PROC MI (version 9.4). Forty imputed data sets were generated for each model and results were combined with PROC MIANALYZE. Imputation model included outcome variable, predictor variables, and complement factors measured at the first three visits during pregnancy

<sup>b</sup> Subjects with APO before 15 weeks were excluded

<sup>c</sup> Subjects with APO before 19 weeks were excluded

<sup>d</sup> SD for Bb = 0.38 µg/ml at 12-15 weeks and 0.37 µg/ml at 16-19 weeks; SD for sC5b9 = 200 ng/ml at 12-15 weeks and 220 ng/ml at 16-19 weeks

## Supplementary Figures

Figure S1

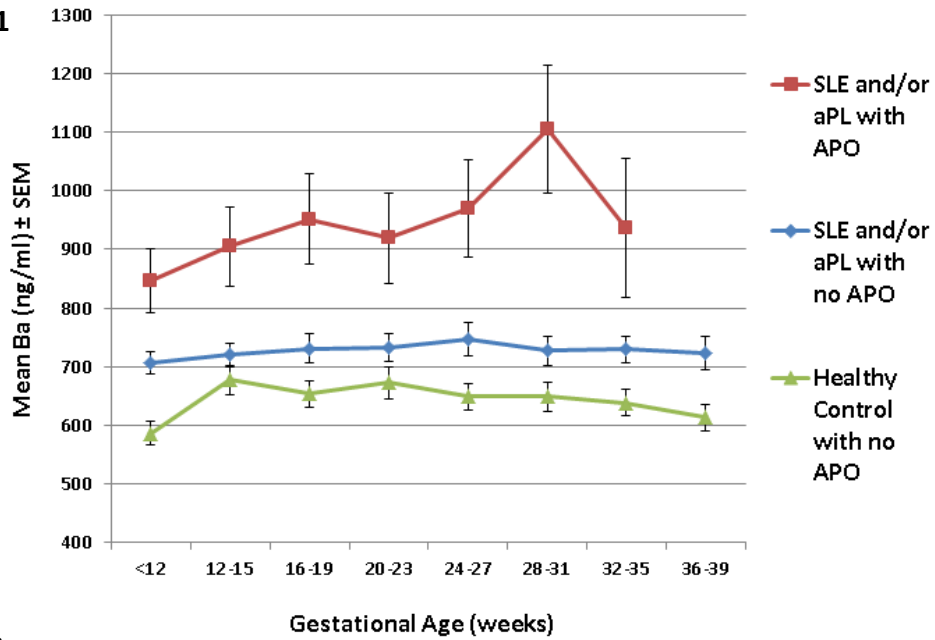

Sample size

|                            | <12 | 12-15 | 16-19 | 20-23 | 24-27 | 28-31 | 32-35 | 36-39 |
|----------------------------|-----|-------|-------|-------|-------|-------|-------|-------|
| SLE and/or aPL with APO    | 51  | 53    | 47    | 45    | 40    | 34    | 24    | -     |
| SLE and/or aPL with no APO | 217 | 222   | 220   | 240   | 206   | 221   | 219   | 123   |
| Healthy Control            | 65  | 115   | 125   | 119   | 111   | 116   | 115   | 102   |

Figure S2

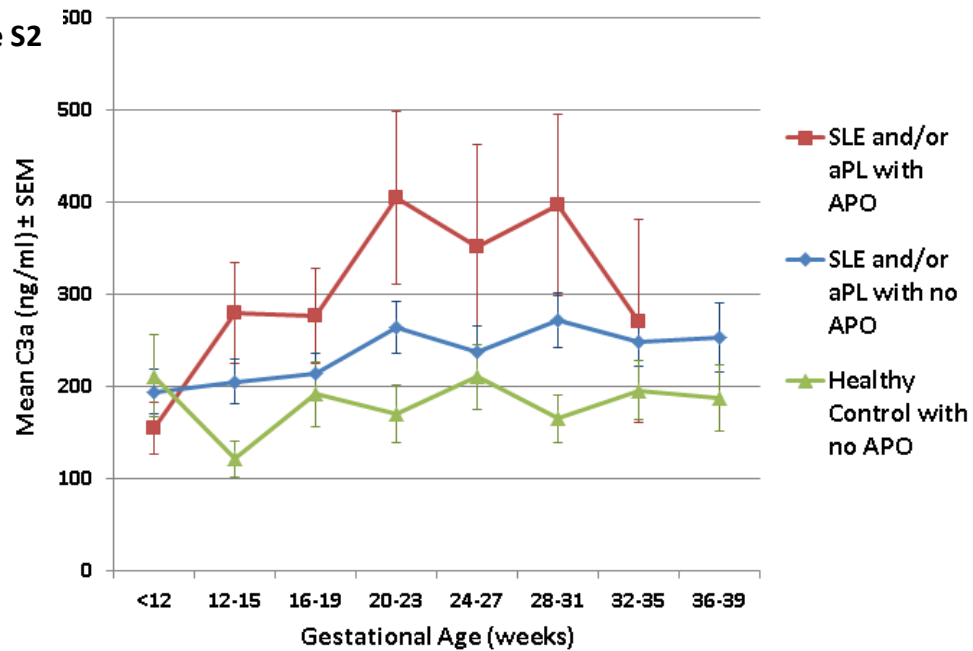

Sample size

|                            | <12 | 12-15 | 16-19 | 20-23 | 24-27 | 28-31 | 32-35 | 36-39 |
|----------------------------|-----|-------|-------|-------|-------|-------|-------|-------|
| SLE and/or aPL with APO    | 66  | 71    | 63    | 62    | 51    | 43    | 27    | -     |
| SLE and/or aPL with no APO | 264 | 271   | 272   | 288   | 261   | 270   | 270   | 151   |
| Healthy Control            | 90  | 149   | 155   | 149   | 145   | 152   | 145   | 122   |

Figure S3

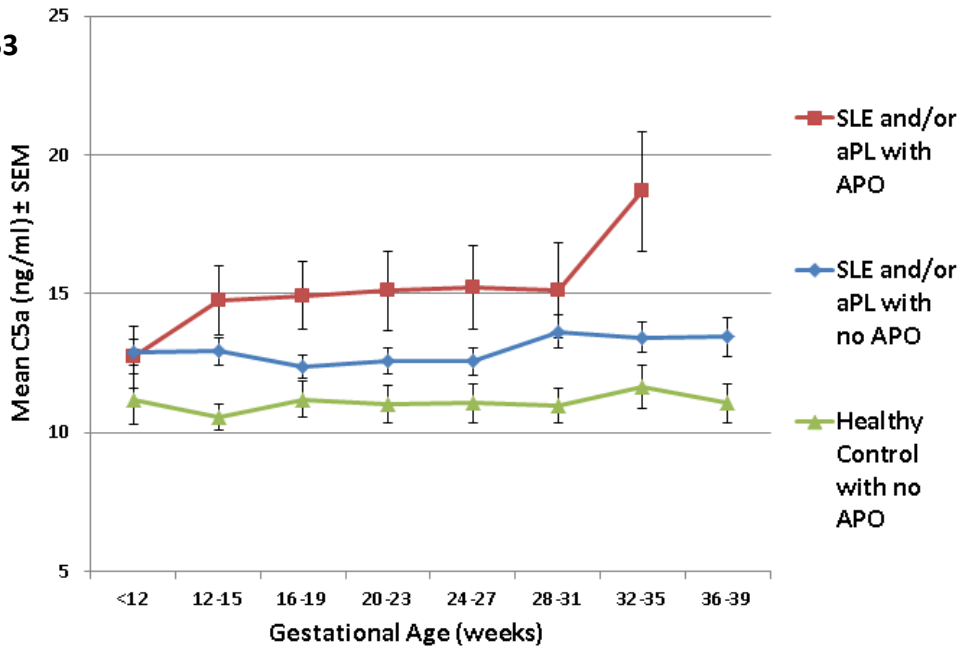

Sample size

|                            |     |     |     |     |     |     |     |     |
|----------------------------|-----|-----|-----|-----|-----|-----|-----|-----|
| SLE and/or aPL with APO    | 64  | 69  | 62  | 59  | 50  | 42  | 27  |     |
| SLE and/or aPL with no APO | 245 | 260 | 260 | 281 | 254 | 261 | 264 | 148 |
| Healthy Control            | 83  | 148 | 154 | 149 | 139 | 149 | 142 | 120 |

Figure S4

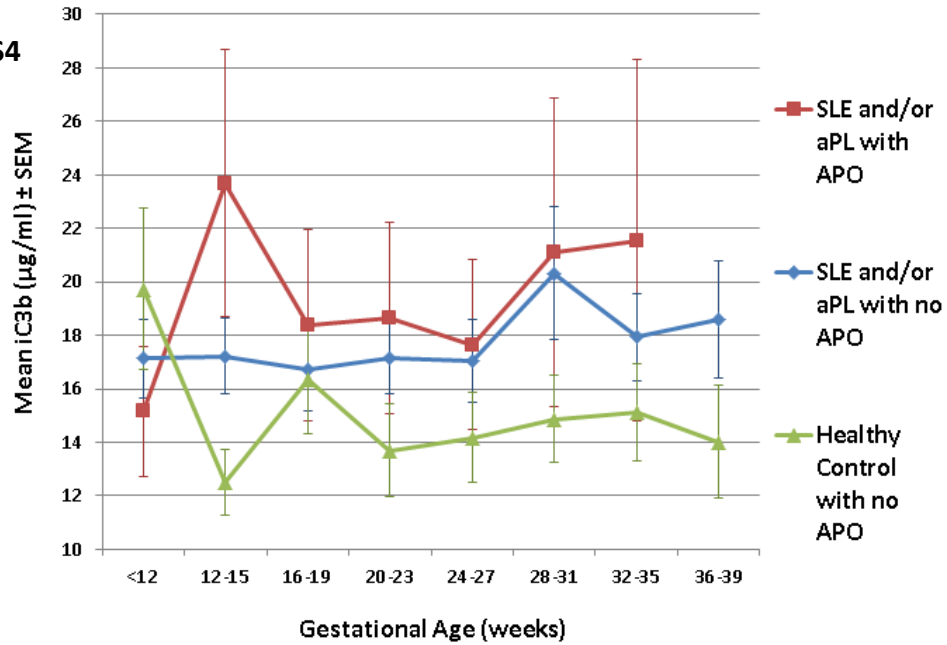

Sample size

|                            |     |     |     |     |     |     |     |     |
|----------------------------|-----|-----|-----|-----|-----|-----|-----|-----|
| SLE and/or aPL with APO    | 63  | 69  | 63  | 59  | 50  | 41  | 26  |     |
| SLE and/or aPL with no APO | 249 | 263 | 262 | 284 | 251 | 261 | 265 | 149 |
| Healthy Control            | 90  | 148 | 153 | 147 | 142 | 151 | 143 | 121 |

Figure S5

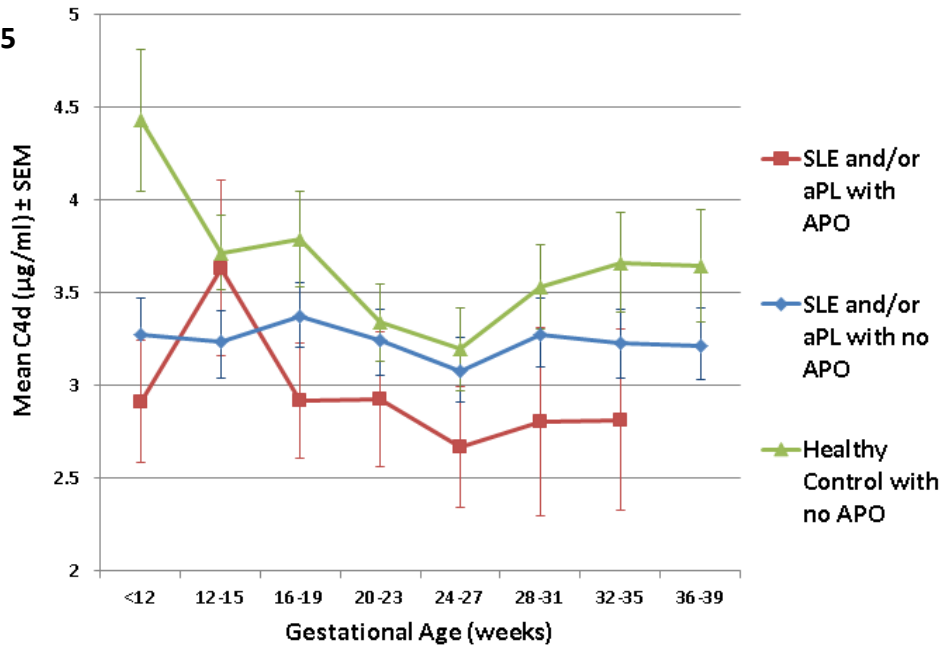

Sample size

|                            |     |     |     |     |     |     |     |     |
|----------------------------|-----|-----|-----|-----|-----|-----|-----|-----|
| SLE and/or aPL with APO    | 65  | 68  | 63  | 60  | 51  | 40  | 27  |     |
| SLE and/or aPL with no APO | 251 | 266 | 264 | 280 | 254 | 265 | 266 | 150 |
| Healthy Control            | 88  | 149 | 155 | 148 | 142 | 150 | 144 | 122 |
